# Supplementary material for: Modeling aerial transmission of pathogens (including the SARS-CoV-2 virus) through aerosol emissions from e-cigarettes
Source: bioRxiv or medRxiv preprint supplement (doi:10.1101/2020.11.21.20235283), 2021-03-24
Supplement: Supplementary file [file media-2.pdf]

## Supplemental Material (2). Respiratory parameters of cigarette smoking

| Study authors & reference | Inhalation/Exhalation Volume ( $T_V$ in mL)                                                                       | Puff time/volume<br>PT seconds, PV mL                                                                                                                                                                   | Comments                                                    |
|---------------------------|-------------------------------------------------------------------------------------------------------------------|---------------------------------------------------------------------------------------------------------------------------------------------------------------------------------------------------------|-------------------------------------------------------------|
| Bernstein (2004)          | 591 (mean), 560 (median)<br>Range 413 – 918                                                                       | PT 1.8 (mean)<br>PT Range 1.6-2.4<br>PV 43 (mean)<br>PV Range 21-66                                                                                                                                     | Summary of 32 studies before 1988<br>US Surgeon Report 1988 |
| Tobin et al. (1982b)      | 841 ± 517* Natural<br>748 ± 323** Natural<br>878 ± 431* Cig Holder<br>815 ± 376** Cig Holder<br>Range 270-1990 mL |                                                                                                                                                                                                         | 10 subjects<br>Non invasive RIP                             |
| Tobin et al. (1982a)      | 790 ± 450 Group Average<br>460 ± 130 Rest Tidal Vol<br>Range 270-1970 mL                                          | PT 4.5 ± 1.3<br>Includes Breath Hold                                                                                                                                                                    | 19 subjects<br>Non invasive RIP                             |
| Nil et al. (1986)         | 500 ± 300* Men<br>600 ± 500** Men<br>400 ± 300* Women<br>400 ± 300** Women                                        | PV 42.3 ± 14.5<br>PV 50.2 ± 16.8<br>PV 41.4 ± 13.3<br>PV 47.0 ± 15.8                                                                                                                                    | 67 men, 48 women                                            |
| Woodman et al. (1986)     | 192-644 Total Inh Smoke<br>315-919 Total Inh Vol                                                                  | PT 1.2-2.9                                                                                                                                                                                              | Inert Krypton gas as smoke tracer                           |
| Robinson et al. (1992)    | 828 ± 126 Low Nicotine<br>845 ± 105 Normal Nicotine                                                               |                                                                                                                                                                                                         |                                                             |
| Charles et al. (2009)     | 833 ± 279 Inhaled Vol<br>897 ± 308 Exhaled Vol<br>500 ± 148 Rest Tidal Vol                                        | 1.82 ± 1.16 Inh Time<br>2.28 ± 0.87 Exh Time                                                                                                                                                            | 74 subjects<br>Non invasive RIP<br>without Cig Holder       |
| Marian et al. (2009)      | 702 ± 437* Inh Vol<br>636 ± 138** Inh Vol<br>577 ± 329* Exh Vol<br>655 ± 195** Exh Vol                            | 1.19 ± 0.29*, Inh Time<br>1.22 ± 0.37**, Inh Time<br>2.01 ± 0.76*, Exh Time<br>2.89 ± 0.72*, Exh Time<br>0.45 ± 0.48*, Breath Hold<br>0.45 ± 0.57**, Breath Hold<br>PV 44.9 ± 12.3*<br>PV 44.5 ± 10.9** | BAT study 1986<br>Table 2                                   |

**Table SM(2).** The table lists various inhaled/exhaled volumes and associated puff times and volumes. The term “puff time” (PT) denotes the time taken to draw smoke from the cigarette (puffing) with “puff volume” (PV) denoting the drawn volume before it mixes with air. Volumes in the second column refer to the inhaled mixture of smoke and air unless it is explicitly specified that it refers to the exhaled mixture. The symbols  $\pm$ , \* and \*\* respectively denote standard deviation, high and low TAR yields. RIP refers to Respiratory Inductive Plethysmograph, BAT is British American Tobacco.

## Supplemental Material (2). Respiratory parameters of cigarette smoking

### References

Bernstein, D. M., 2004.

A review of the influence of particle size, puff volume and inhalation pattern on the deposition of cigarette smoke particles in the respiratory tract. *Inhalation toxicology* 16 (10), 675–689.

Charles, Krautter, and Mariner] Charles, F., Krautter, G. R., Mariner, D. C., 2009.

Post-puff respiration measures on smokers of different tar yield cigarettes. *In-halation toxicology* 21 (8), 712–718.

Marian, C., O'Connor, R. J., Djordjevic, M. V., Rees, V. W., Hatsukami, D. K., Shields, P. G., 2009.

Reconciling human smoking behavior and machine smoking patterns: implications for understanding smoking behavior and the impact on laboratory studies. *Cancer Epidemiology and Prevention Biomarkers* 18 (12), 3305–3320.

Nil, Woodson, and Bättig] Nil, R., Woodson, P. P., Bättig, K., 1986.

Smoking behaviour and personality patterns of smokers with low and high co absorption. *Clinical science* 71 (5), 595–603.

Robinson, Pritchard, and Davis] Robinson, J. H., Pritchard, W. S., Davis, R. A., 1992.

Psychopharmacological effects of smoking a cigarette with typical "tar" and carbon monoxide yields but minimal nicotine. *Psychopharmacology* 108 (4), 466–472.

[Tobin, M. J., Jenouri, G., Sackner, M. A., 1982a.

Subjective and objective measurement of cigarette smoke inhalation. *Chest* 82 (6), 696–700.

Tobin, M. J., Schneider, A. W., Sackner, M. A., 1982b.

Breathing pattern during and after smoking cigarettes. *Clinical Science* 63 (5), 473–483.

Woodman, G., Newman, S., Pavia, D., Clarke, S., 1986.

Inhaled smoke volume, puffing indices and carbon monoxide uptake in asymptomatic cigarette smokers. *Clinical Science* 71 (4), 421–427.
